# Supplementary material for: Synthesis of W-modified CeO2/ZrO2 catalysts for selective catalytic reduction of NO with NH3
Source: Royal Society of Chemistry journal article supplement (doi:10.1039/d2ra04862k), 2022-01-01
Supplement: d2ra04862k1.pdf [file d2ra04862k1.pdf]

## Supporting information

### **Synthesis of W-modified CeO<sub>2</sub>/ZrO<sub>2</sub> catalysts for selective catalytic reduction of NO with NH<sub>3</sub>**

Chenglong Li<sup>a</sup>, Zhitao Han<sup>a\*</sup>, Yuqing Hu<sup>a</sup>, Tingjun Liu<sup>a</sup>, Xinxiang Pan<sup>a,b</sup>

a. Marine Engineering College, Dalian Maritime University, Dalian 116026, China;

b. School of Electronic and Information Technology, Guangdong Ocean University, Zhanjiang  
524088, China

Correspondence information: Dr. Zhitao Han, Dalian Maritime University, No.1, Linghai Road,

Dalian 116026, China, [hanzt@dmlu.edu.cn](mailto:hanzt@dmlu.edu.cn).

## Table of content

**Table. S1** Comparison of the performance over  $\text{Ce}_{0.4}/\text{W}_{0.1}\text{ZrO}_x$  catalyst with related literatures.

**Fig. S1.** SCR performance test results of fresh  $\text{Ce}_{0.4}/\text{W}_{0.1}\text{ZrO}_x$  and used  $\text{Ce}_{0.4}/\text{W}_{0.1}\text{ZrO}_x$  (2<sup>nd</sup> cycle) catalyst: (a)  $\text{NO}_x$  conversion and (b)  $\text{N}_2$  selectivity.

**Fig. S2.** XRD patterns of fresh  $\text{Ce}_{0.4}/\text{ZrO}_2$  and used  $\text{Ce}_{0.4}/\text{W}_{0.1}\text{ZrO}_x$  (2<sup>nd</sup> cycle) catalysts

**Fig. S3.**  $\text{H}_2$ -TPR profiles of fresh  $\text{Ce}_{0.4}/\text{ZrO}_2$  and used  $\text{Ce}_{0.4}/\text{W}_{0.1}\text{ZrO}_x$  (2<sup>nd</sup> cycle) catalysts in the range of 100-900 °C.

**Fig. S4.**  $\text{NH}_3$ -TPD curves of fresh  $\text{Ce}_{0.4}/\text{W}_{0.1}\text{ZrO}_x$  and used  $\text{Ce}_{0.4}/\text{W}_{0.1}\text{ZrO}_x$  (2<sup>nd</sup> cycle) catalysts in the range of 50-700 °C.

**Fig. S5.** TEM pattern of  $\text{W}_{0.1}\text{ZrO}_x$  sample

**Fig. S6.** EDS pattern over  $\text{W}_{0.1}\text{ZrO}_x$  sample

**Table. S1** Comparison of the performance over  $\text{Ce}_{0.4}/\text{W}_{0.1}\text{ZrO}_x$  catalyst with related literatures.

| Catalysts                                                           | Preparation method                                                                                     | Reaction mixture                                                                                                                                                                                | $T_{80\%}$ , °C           | Ref       |
|---------------------------------------------------------------------|--------------------------------------------------------------------------------------------------------|-------------------------------------------------------------------------------------------------------------------------------------------------------------------------------------------------|---------------------------|-----------|
| $\text{Ce}_{0.4}/\text{W}_{0.1}\text{ZrO}_x$                        | Co-precipitation ( $\text{W}_{0.1}\text{ZrO}_x$ )<br>Impregnation                                      | $[\text{NO}] = [\text{NH}_3] = 500$ ppm, $[\text{O}_2] = 5$ vol. %<br>$\text{N}_2$ as balance, GHSV = 60,000 $\text{h}^{-1}$                                                                    | 226-446 ( $\text{NO}_x$ ) | This work |
| $\text{WO}_3/\text{CeO}_2\text{-ZrO}_2$                             | Incipient wetness impregnation                                                                         | $[\text{NO}] = [\text{NH}_3] = 550$ ppm, $[\text{O}_2] = 6$ vol. %<br>$[\text{CO}_2] = 10$ vol. %, $[\text{H}_2\text{O}] = 10$ vol. %<br>$\text{N}_2$ as balance, GHSV = 90,000 $\text{h}^{-1}$ | 290-500 (NO)              | 1         |
| $\text{WO}_3/\text{Ce}_{0.65}\text{Zr}_{0.35}\text{O}_2$            | Wet impregnation                                                                                       | $[\text{NO}] = [\text{NH}_3] = 0.1$ %, $[\text{O}_2] = 5$ vol. %<br>$[\text{H}_2\text{O}] = 10$ vol. %, Ar as balance<br>GHSV = 30,000 $\text{h}^{-1}$                                          | 245-450 ( $\text{NO}_x$ ) | 2         |
| $\text{WO}_3/\text{ZrO}_2\text{-Ce}_{0.6}\text{Zr}_{0.4}\text{O}_2$ | Incipient wetness impregnation<br>Solution combustion method                                           | $[\text{NO}] = [\text{NH}_3] = 1000$ ppm, $[\text{O}_2] = 10$ vol. %<br>$[\text{H}_2\text{O}] = 10$ vol. %, $\text{N}_2$ as balance<br>GHSV = 50,000 $\text{h}^{-1}$                            | 270-510 ( $\text{NO}_x$ ) | 3         |
| $\text{WO}_3/\text{Ce-Zr}$ (40-60)                                  | Impregnation                                                                                           | $[\text{NO}] = [\text{NH}_3] = 500$ ppm, $[\text{O}_2] = 10$ vol. %<br>$[\text{CO}_2] = 10$ vol. %, $[\text{H}_2\text{O}] = 10$ vol. %<br>$\text{N}_2$ as balance, WHSV = 200 $\text{h}^{-1}$   | 250-500 ( $\text{NO}_x$ ) | 4         |
| $\text{WO}_3\text{-Ce}_{0.75}\text{Zr}_{0.25}\text{O}_2$            | Citric-aide sol-gel ( $\text{Ce}_{0.75}\text{Zr}_{0.25}\text{O}_2$ )<br>Incipient wetness impregnation | $[\text{NO}] = [\text{NH}_3] = 500$ ppm, $[\text{O}_2] = 5$ vol. %<br>$\text{N}_2$ as balance, GHSV = 30,000 $\text{h}^{-1}$                                                                    | 290-400 ( $\text{NO}_x$ ) | 5         |

|                                                                                                                                             |                                                                                 |                                                                                                                                                                                                      |                            |    |
|---------------------------------------------------------------------------------------------------------------------------------------------|---------------------------------------------------------------------------------|------------------------------------------------------------------------------------------------------------------------------------------------------------------------------------------------------|----------------------------|----|
| W-CeZr<br>(SO <sub>2</sub> -treatment)                                                                                                      | Wet impregnation                                                                | [NO] = 900 ppm, [NO <sub>2</sub> ] = 100 ppm<br>[NH <sub>3</sub> ] = 1000 ppm, [SO <sub>2</sub> ] = 100 ppm<br>[O <sub>2</sub> ] = 6 vol. %, N <sub>2</sub> as balance<br>WHSV = 300 h <sup>-1</sup> | 295-500 (NO <sub>x</sub> ) | 6  |
| CeO <sub>2</sub> -ZrO <sub>2</sub> -WO <sub>3</sub>                                                                                         | Hydrothermal synthesis                                                          |                                                                                                                                                                                                      | 185-450 (NO)               | 7  |
|                                                                                                                                             | Incipient impregnation                                                          | [NO] = [NH <sub>3</sub> ] = 600 ppm, [O <sub>2</sub> ] = 5 vol. %<br>N <sub>2</sub> as balance, GHSV = 60,000 h <sup>-1</sup>                                                                        | 245-450 (NO)               |    |
|                                                                                                                                             | Co-precipitation                                                                |                                                                                                                                                                                                      | 190-430 (NO)               |    |
|                                                                                                                                             | Sol-gel                                                                         |                                                                                                                                                                                                      | 225-450 (NO)               |    |
| CeO <sub>2</sub> /ZrO <sub>2</sub> -S                                                                                                       | Impregnation                                                                    | [NO] = [NH <sub>3</sub> ] = 500 ppm, [O <sub>2</sub> ] = 5 vol. %<br>N <sub>2</sub> as balance, GHSV = 30,000 h <sup>-1</sup>                                                                        | 235-500 (NO)               | 8  |
| Ce <sub>0.75</sub> Zr <sub>0.25</sub> O <sub>2</sub> -PO <sub>4</sub> <sup>3-</sup><br>(SO <sub>2</sub> + 10%H <sub>2</sub> O<br>treatment) | Sol-gel (Ce <sub>0.75</sub> Zr <sub>0.25</sub> O <sub>2</sub> )<br>Impregnation | [NO] = [NH <sub>3</sub> ] = 500 ppm, [O <sub>2</sub> ] = 5 vol. %<br>N <sub>2</sub> as balance, GHSV = 30,000 h <sup>-1</sup>                                                                        | 235-470 (NO <sub>x</sub> ) | 9  |
| NbO <sub>x</sub> /Ce <sub>0.75</sub> Zr <sub>0.25</sub> O <sub>2</sub>                                                                      | Sol-gel (Ce <sub>0.75</sub> Zr <sub>0.25</sub> O <sub>2</sub> )<br>Impregnation | [NO] = [NH <sub>3</sub> ] = 500 ppm, [O <sub>2</sub> ] = 5 vol. %<br>[CO <sub>2</sub> ] = 10 vol. %, N <sub>2</sub> as balance<br>GHSV = 300,000 h <sup>-1</sup>                                     | 190-450 (NO <sub>x</sub> ) | 10 |
| MoO <sub>3</sub> /CeO <sub>2</sub> -ZrO <sub>2</sub>                                                                                        | Hydrothermal synthesis<br>(CeO <sub>2</sub> -ZrO <sub>2</sub> )<br>Impregnation | [NO] = [NH <sub>3</sub> ] = 500 ppm, [O <sub>2</sub> ] = 5 vol. %<br>He as balance, GHSV = 98,000 h <sup>-1</sup>                                                                                    | 245-430 (NO <sub>x</sub> ) | 11 |
| NiO-CeO <sub>2</sub> -ZrO <sub>2</sub>                                                                                                      | Sol-gel                                                                         | [NO] = [NH <sub>3</sub> ] = 500 ppm, [O <sub>2</sub> ] = 5 vol. %<br>[CO <sub>2</sub> ] = 10 vol. %, N <sub>2</sub> as balance<br>GHSV = 300,000 h <sup>-1</sup>                                     | 250-450 (NO <sub>x</sub> ) | 12 |

## Reference:

- 1 Y. Li, H. Cheng, D. Li, Y. Qin, Y. Xie and S. Wang, *Chem. Commun.*, 2008, **12**, 1470-1472.
- 2 Z. Fang, B. Yuan, T. Lin, H. Xu, Y. Cao, Z. Shi, M. Gong and Y. Chen, *Chem. Eng. Res. Des.*, 2015, **94**, 648-659.
- 3 T. Baidya, A. Bernhard, M. Elsener and O. Kröcher, *Top. Catal.*, 2013, **56**, 23-28.
- 4 F. Can, S. Berland, S. Royer, X. Courtois and D. Duprez, *ACS Catal.*, 2013, **3**, 1120-1132.
- 5 M. Wang, Z. Si, L. Chen, X. Wu and J. Yu, *J. Rare Earths.*, 2013, **31**, 1148-1156.
- 6 Väliheikki, T. Kolli, M. Huuhtanen, T. Maunula and R. L. Keiski, *Top. Catal.*, 2015, **58**, 1002-1011.
- 7 P. Ning, Z. Song, H. Li, Q. Zhang, X. Liu, J. Zhang, X. Tang and Z. Huang, *Appl. Surf. Sci.*, 2015, **332**, 130-137.
- 8 Z. Han, X. Li, X. Wang, Y. Gao, S. Yang, L. Song, J. Dong and X. Pan, *J. Colloid Interface Sci.*, 2022, **608**, 2718-2729.
- 9 Z. Si, D. Weng, X. Wu, R. Ran and Z. Ma, *Catal. Commun.*, 2012, **17**, 146-149.
- 10 Z. Ma, X. Wu, Z. Si, D. Weng, J. Ma and T. Xu, *Appl. Catal., B*, 2015, **179**, 380-394.
- 11 Z. Liu, H. Su, J. Li and Y. Li, *Catal. Commun.*, 2015, **65**, 51-54.
- 12 Z. Si, D. Weng, X. Wu, Z. Ma, J. Ma and R. Ran, *Catal. Today*, 2013, **201**, 122-130.

Fig. S1

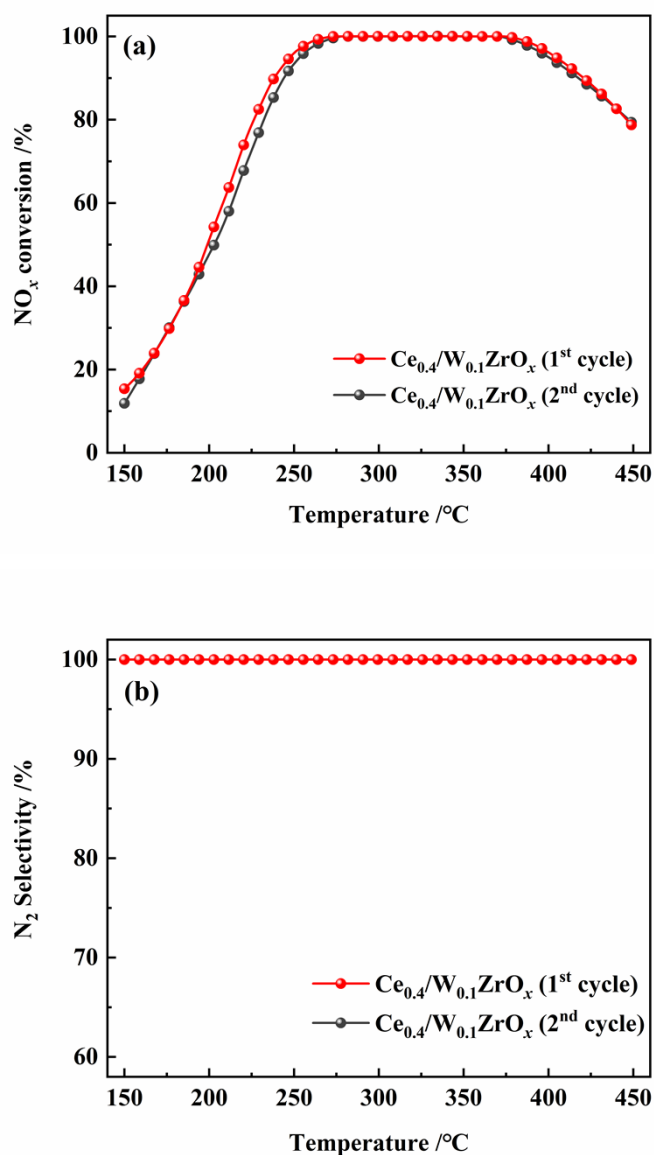

Fig. S1. SCR performance test results of  $\text{Ce}_{0.4}/\text{W}_{0.1}\text{ZrO}_x$  (1<sup>st</sup> cycle) and  $\text{Ce}_{0.4}/\text{W}_{0.1}\text{ZrO}_x$  (2<sup>nd</sup> cycle) catalyst: (a)  $\text{NO}_x$  conversion and (b)  $\text{N}_2$  selectivity.

(Reaction conditions: 0.5 mL catalyst,  $[\text{NO}] = [\text{NH}_3] = 500$  ppm,  $[\text{O}_2] = 5$  vol.%,

balance with  $\text{N}_2$ , total flow rate =  $500 \text{ mL}\cdot\text{min}^{-1}$  and GHSV =  $60,000 \text{ h}^{-1}$ )

Fig. S2

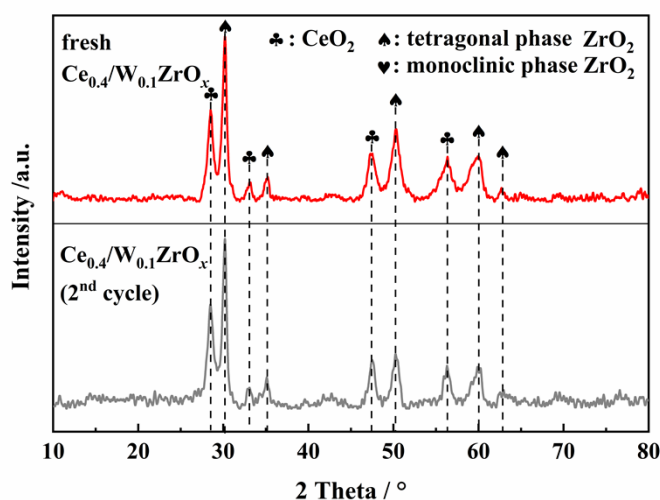

Fig. S2. XRD patterns of fresh  $\text{Ce}_{0.4}/\text{W}_{0.1}\text{ZrO}_x$  and used  $\text{Ce}_{0.4}/\text{W}_{0.1}\text{ZrO}_x$  (2<sup>nd</sup> cycle) catalysts

To investigate the effect of stability reaction on the structure over  $\text{Ce}_{0.4}/\text{W}_{0.1}\text{ZrO}_x$  catalyst, the structures of fresh  $\text{Ce}_{0.4}/\text{W}_{0.1}\text{ZrO}_x$  and used  $\text{Ce}_{0.4}/\text{W}_{0.1}\text{ZrO}_x$  (2<sup>nd</sup> cycle) catalysts were characterized by XRD. It could be seen from Fig. S2 that the intensities of  $\text{CeO}_2$  and  $\text{ZrO}_2$  peaks did not change significantly before and after the SCR reaction. Moreover, no new peaks were detected on the XRD curve of  $\text{Ce}_{0.4}/\text{W}_{0.1}\text{ZrO}_x$  (2<sup>nd</sup> cycle) catalyst compared to the fresh  $\text{Ce}_{0.4}/\text{W}_{0.1}\text{ZrO}_x$  catalyst. It was demonstrated that the structure of  $\text{Ce}_{0.4}/\text{W}_{0.1}\text{ZrO}_x$  catalyst with better stability during the SCR reactions.

**Fig. S3**

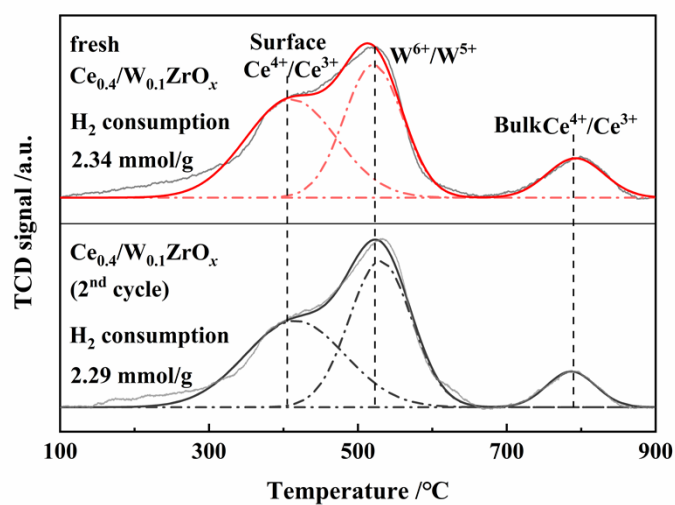

**Fig. S3.** H<sub>2</sub>-TPR profiles of fresh  $\text{Ce}_{0.4}/\text{W}_{0.1}\text{ZrO}_x$  and used  $\text{Ce}_{0.4}/\text{W}_{0.1}\text{ZrO}_x$  (2<sup>nd</sup> cycle) catalysts in the range of 100-900 °C.

As shown in Fig. S3, intensities of the three reducing peaks over  $\text{Ce}_{0.4}/\text{W}_{0.1}\text{ZrO}_x$  (2<sup>nd</sup> cycle) catalyst did not decrease significantly compared to the fresh catalyst. In addition, the total H<sub>2</sub> consumption of the fresh  $\text{Ce}_{0.4}/\text{W}_{0.1}\text{ZrO}_x$  catalyst only decreased by 0.05 mmol/g after cycling two times. It was indicated that  $\text{Ce}_{0.4}/\text{W}_{0.1}\text{ZrO}_x$  catalyst still maintained a good redox property after the SCR reactions.



**Fig. S4**

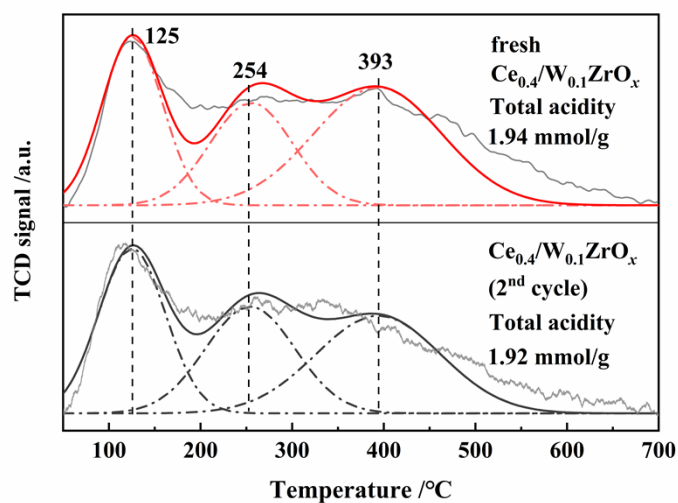

**Fig. S4.** NH<sub>3</sub>-TPD curves of fresh Ce<sub>0.4</sub>/W<sub>0.1</sub>ZrO<sub>x</sub> and used Ce<sub>0.4</sub>/W<sub>0.1</sub>ZrO<sub>x</sub> (2<sup>nd</sup> cycle) catalysts in the range of 50-700 °C.

The surface acidities of two catalysts were also investigated by NH<sub>3</sub>-TPD characterization technique. It could be seen from Fig. S4 that NH<sub>3</sub>-TPD profiles of the fresh Ce<sub>0.4</sub>/W<sub>0.1</sub>ZrO<sub>x</sub> and used Ce<sub>0.4</sub>/W<sub>0.1</sub>ZrO<sub>x</sub> (2<sup>nd</sup> cycle) catalysts both exhibited three desorption peaks, which intensities of the corresponding peaks were similar. In other words, there was no obvious damage in the surface acidity over Ce<sub>0.4</sub>/W<sub>0.1</sub>ZrO<sub>x</sub> catalyst after the SCR reactions.

**Fig. S5**

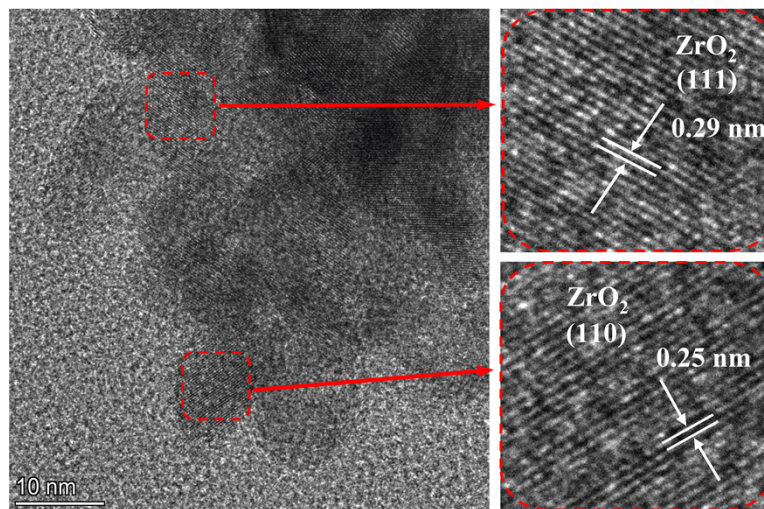

**Fig. S5.** TEM pattern of  $W_{0.1}ZrO_x$  sample

**Fig. S6**

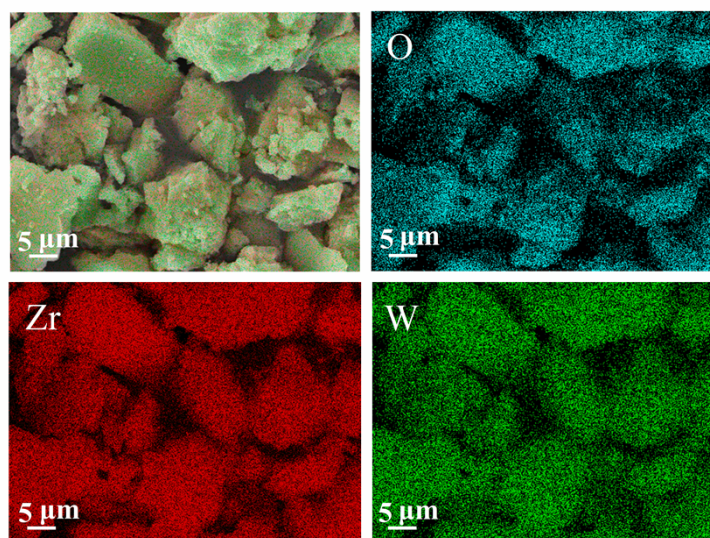

**Fig. S6.** EDS pattern over  $W_{0.1}ZrO_x$  sample

To further investigate the dispersion of W, Zr and O elements over  $W_{0.1}ZrO_x$  sample, EDS mapping was conducted and the results showed that the tungsten species were well dispersed on the support, as presented in Fig. S6.
